# Supplementary material for: Highly Efficient Quantum Sieving in Porous Graphene-like Carbon Nitride for Light Isotopes Separation
Source: PubMed Central journal article supplement (PMC4728688; doi:10.1038/srep19952), 2016-01-27
Supplement: srep19952-s1.pdf [file srep19952-s1.pdf]

## Supplementary Information for

### Highly Efficient Quantum Sieving in Porous Graphene-like Carbon Nitride for Light Isotopes Separation

Yuanyuan Qu<sup>a</sup>, Feng Li<sup>a,b</sup>, Hongcai Zhou<sup>a</sup>, Mingwen Zhao<sup>a\*</sup>

<sup>a</sup> School of Physics, Shandong University, Jinan 250100, Shandong, China;

<sup>b</sup> School of Physics and Technology, University of Jinan, Jinan 250022, Shandong, China

## Supplementary Equations

### *Deduction of energy-temperature-dependent transmission probability $p(E,T)$*

According to Maxwell-Boltzmann distribution, the distribution of the molecular velocities at temperature  $T$  in one-dimension is given by:

$$p(v,T) = \left( \frac{m}{2\pi k_B T} \right)^{1/2} e^{-\frac{mv^2}{2k_B T}}$$

Therefore, the thermally weighted transmission can be obtained by

$$p(T) = \int p(v,T) t\left(\frac{1}{2}mv^2\right) dv = \int p(E,T) t(E) dE$$

where  $t(E)$  is the quantum tunneling probability as a function of kinetic energy as introduced in the main text.

As such, we can obtain:

$$\begin{aligned}
p(E,T) &= p(v,T) \frac{dv}{dE} \\
&= \left( \frac{m}{2\pi k_B T} \right)^{1/2} e^{-\frac{E}{k_B T}} \frac{1}{\sqrt{2Em}} \\
&= \left( \frac{1}{4\pi k_B T E} \right)^{1/2} e^{-\frac{E}{k_B T}}
\end{aligned}$$

### ***Deduction of surface tension $\sigma$***

Similar to the force  $f$  in one-dimension and the pressure  $P$  in three-dimension, the surface tension  $\sigma$  in two-dimension can be obtained by the partial derivative of the surface energy  $E$  with respect to the surface area  $S$ :

$$\sigma = \frac{\partial E}{\partial S}.$$

For the unit cell of  $C_2N$ - $h2D$  lattice at no strain, the surface area is  $S_0 = \frac{\sqrt{3}}{2} a_0^2$ , where  $a_0$  is the lattice constant. For the lattice under strain  $\varepsilon$ ,  $S = \frac{\sqrt{3}}{2} a^2 = \frac{\sqrt{3}}{2} (a_0(1 + \varepsilon))^2$ .

Therefore, we can obtain the surface tension as a function of the tensile strain as follows:

$$\begin{aligned}
\sigma &= \frac{\partial E}{\partial S} \\
&= \frac{\partial E}{\partial \varepsilon} \frac{\partial \varepsilon}{\partial S} \\
&= \frac{\partial E}{\partial \varepsilon} \frac{1}{\sqrt{3} a_0^2 (1 + \varepsilon)}
\end{aligned}$$

## Supplementary Figure

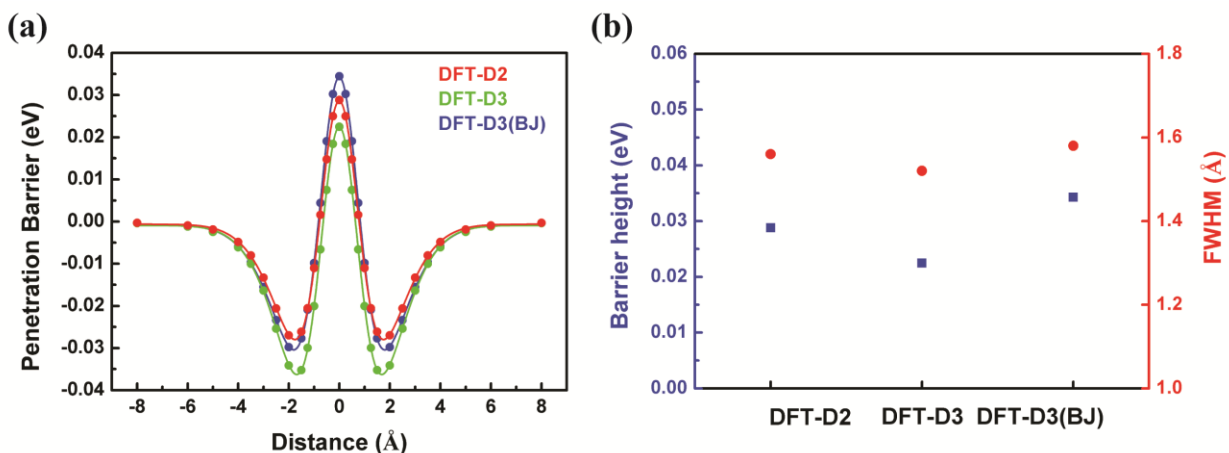

**Figure S1** (a) Comparison between the energy profiles for He passing through the pore of the C<sub>2</sub>N-h<sub>2</sub>D membrane by using DFT-D2, DFT-D3 and DFT-D3(BJ) correction schemes under the strain of 3%. Colored points indicate the results obtained by first-principles calculations; while the curves show the numerically interpolated potentials. (b) Comparison between the barrier height and the FWHM by using DFT-D2, DFT-D3 and DFT-D3(BJ) correction under the strain of 3%.

## Supplementary Table

**Table S1** The selectivities (**S**) and the permeances (**Q**, mol/s/cm<sup>2</sup>/bar) under different strains for temperatures ranging from 1 to 22 K by using DFT-D3 correction. The red numbers identify the conditions satisfying the industrial acceptable selectivity ( $> 6$ ) and permeance ( $> 6.7 \times 10^{-8}$  mol/s/cm<sup>2</sup>/bar).

| Temperature | 1K   |                       | 2K   |                       | 5K   |                       | 10K  |                      |
|-------------|------|-----------------------|------|-----------------------|------|-----------------------|------|----------------------|
| strain      | S    | Q                     | S    | Q                     | S    | Q                     | S    | Q                    |
| 1.5%        | 22.9 | $3.4 \times 10^{-13}$ | 22.9 | $5.7 \times 10^{-11}$ | 21.1 | $8.5 \times 10^{-10}$ | 18.4 | $2.0 \times 10^{-9}$ |
| 2%          | 18.5 | $6.8 \times 10^{-12}$ | 18.4 | $1.1 \times 10^{-9}$  | 15.7 | $1.7 \times 10^{-8}$  | 12.3 | $4.1 \times 10^{-8}$ |
| 2.5%        | 9.1  | $1.3 \times 10^{-10}$ | 9.0  | $2.1 \times 10^{-8}$  | 8.4  | $3.1 \times 10^{-7}$  | 7.4  | $7.4 \times 10^{-7}$ |
| 3%          | 8.6  | $1.6 \times 10^{-9}$  | 8.3  | $2.7 \times 10^{-7}$  | 7.0  | $4.2 \times 10^{-6}$  | 5.4  | $1.1 \times 10^{-5}$ |
| 3.5%        | 3.7  | $1.8 \times 10^{-8}$  | 3.7  | $3.0 \times 10^{-6}$  | 3.8  | $5.3 \times 10^{-5}$  | 3.4  | $1.7 \times 10^{-4}$ |
| Temperature | 15K  |                       | 18K  |                       | 21K  |                       | 22K  |                      |
| strain      | S    | Q                     | S    | Q                     | S    | Q                     | S    | Q                    |
| 1.5%        | 16.1 | $3.2 \times 10^{-9}$  | 14.0 | $4.2 \times 10^{-9}$  | 10.4 | $6.0 \times 10^{-9}$  | 9.0  | $9.4 \times 10^{-9}$ |
| 2%          | 10.3 | $6.5 \times 10^{-8}$  | 8.7  | $8.7 \times 10^{-8}$  | 6.5  | $1.4 \times 10^{-7}$  | 5.7  | $1.5 \times 10^{-7}$ |
| 2.5%        | 6.5  | $1.2 \times 10^{-6}$  | 5.5  | $1.6 \times 10^{-6}$  | 4.2  | $2.6 \times 10^{-6}$  | 3.8  | $2.7 \times 10^{-6}$ |
| 3%          | 4.4  | $1.9 \times 10^{-5}$  | 3.7  | $2.6 \times 10^{-5}$  | 2.9  | $4.1 \times 10^{-5}$  | 2.7  | $4.3 \times 10^{-5}$ |
| 3.5%        | 2.9  | $2.9 \times 10^{-4}$  | 2.5  | $4.0 \times 10^{-4}$  | 2.2  | $6.0 \times 10^{-4}$  | 2.1  | $6.1 \times 10^{-4}$ |

**Table S2** The selectivities (**S**) and the permeances (**Q**, mol/s/cm<sup>2</sup>/bar) under different strains for temperatures ranging from 4 to 17 K by using DFT-D3(BJ) correction. The red numbers identify the conditions satisfying the industrial acceptable selectivity ( $> 6$ ) and permeance ( $> 6.7 \times 10^{-8}$  mol/s/cm<sup>2</sup>/bar).

| Temperature | 4K         |                                        | 5K         |                                        | 8K         |                                        | 10K        |                                        |
|-------------|------------|----------------------------------------|------------|----------------------------------------|------------|----------------------------------------|------------|----------------------------------------|
| strain      | S          | Q                                      | S          | Q                                      | S          | Q                                      | S          | Q                                      |
| 2.5%        | 19.5       | $2.1 \times 10^{-10}$                  | 19.6       | $3.5 \times 10^{-10}$                  | 19.4       | $8.4 \times 10^{-10}$                  | 18.8       | $1.2 \times 10^{-9}$                   |
| 3%          | 12.8       | $3.1 \times 10^{-9}$                   | 12.9       | $5.2 \times 10^{-9}$                   | 12.8       | $1.2 \times 10^{-8}$                   | 12.3       | $1.7 \times 10^{-8}$                   |
| 3.5%        | 7.8        | $4.9 \times 10^{-8}$                   | <b>8.1</b> | <b><math>8.0 \times 10^{-8}</math></b> | <b>8.3</b> | <b><math>1.9 \times 10^{-7}</math></b> | <b>8.1</b> | <b><math>2.6 \times 10^{-7}</math></b> |
| 4%          | 4.0        | $6.8 \times 10^{-7}$                   | 4.2        | $1.1 \times 10^{-6}$                   | 4.5        | $2.5 \times 10^{-6}$                   | 4.6        | $3.6 \times 10^{-6}$                   |
| Temperature | 12K        |                                        | 15K        |                                        | 16K        |                                        | 17K        |                                        |
| strain      | S          | Q                                      | S          | Q                                      | S          | Q                                      | S          | Q                                      |
| 2.5%        | 17.9       | $1.6 \times 10^{-9}$                   | 15.9       | $2.3 \times 10^{-9}$                   | 15.0       | $2.6 \times 10^{-9}$                   | 13.8       | $2.9 \times 10^{-9}$                   |
| 3%          | 11.7       | $2.2 \times 10^{-8}$                   | 10.2       | $3.3 \times 10^{-8}$                   | 9.5        | $3.8 \times 10^{-8}$                   | 8.7        | $4.3 \times 10^{-8}$                   |
| 3.5%        | <b>7.7</b> | <b><math>3.5 \times 10^{-7}</math></b> | <b>6.7</b> | <b><math>5.2 \times 10^{-7}</math></b> | <b>6.2</b> | <b><math>5.9 \times 10^{-7}</math></b> | 5.7        | $6.9 \times 10^{-7}$                   |
| 4%          | 4.5        | $4.8 \times 10^{-6}$                   | 4.1        | $7.1 \times 10^{-6}$                   | 3.9        | $8.2 \times 10^{-6}$                   | 3.6        | $9.5 \times 10^{-6}$                   |

## Supplementary Methods

### *Calculation of DFT-D3 and DFT-D3(BJ) correction schemes*

The DFT-D3 and DFT-D3(BJ) correction schemes for the potential barriers are calculated by the Grimme's DFTD3 program, which is an open-source program developed by Lori A. Burns. The program can be freely downloaded at <http://www.psicode.org/psi4manual/master/dftd3.html>.

## Supplementary Data

### *The Optimized Coordinates of the unit cell of unstretched C<sub>2</sub>N-h2D lattice*

*(Cartesian coordinates, in unit of Angstroms)*

C 3.449333 1.143009 0.000000  
 C 2.714540 2.415711 0.000000  
 C 9.063802 3.558728 0.000000  
 C 7.594219 3.558730 0.000000

|   |          |          |          |
|---|----------|----------|----------|
| C | 4.879661 | 1.143025 | 0.000000 |
| C | 5.614455 | 2.415723 | 0.000000 |
| C | 9.044185 | 6.070146 | 0.000000 |
| C | 9.778977 | 4.797444 | 0.000000 |
| C | 3.429715 | 3.654427 | 0.000000 |
| C | 4.899298 | 3.654425 | 0.000000 |
| C | 6.879063 | 4.797432 | 0.000000 |
| C | 7.613857 | 6.070131 | 0.000000 |
| N | 2.756981 | 0.000000 | 0.000000 |
| N | 1.378485 | 2.387614 | 0.000000 |
| N | 6.950515 | 2.387617 | 0.000000 |
| N | 5.572031 | 0.000000 | 0.000000 |
| N | 2.786019 | 4.825541 | 0.000000 |
| N | 5.543002 | 4.825539 | 0.000000 |

***The Optimized Coordinates of unit cell of unstretched C<sub>2</sub>N-h<sub>2</sub>D lattice with a He atom***

*(Cartesian coordinates, in unit of Angstroms)*

|   |          |           |          |
|---|----------|-----------|----------|
| C | 3.449666 | 1.143360  | 0.000000 |
| C | 2.714949 | 2.415821  | 0.000000 |
| C | 9.063581 | 3.559180  | 0.000000 |
| C | 7.594247 | 3.559178  | 0.000000 |
| C | 4.879239 | 1.143380  | 0.000000 |
| C | 5.613857 | 2.415843  | 0.000000 |
| C | 9.043633 | 6.069697  | 0.000000 |
| C | 9.778350 | 4.797236  | 0.000000 |
| C | 3.429718 | 3.653877  | 0.000000 |
| C | 4.899052 | 3.653878  | 0.000000 |
| C | 6.879442 | 4.797214  | 0.000000 |
| C | 7.614059 | 6.069677  | 0.000000 |
| N | 2.758745 | -0.000046 | 0.000000 |

|    |           |          |          |
|----|-----------|----------|----------|
| N  | 9.708306  | 2.389084 | 0.000000 |
| N  | 6.949546  | 2.389102 | 0.000000 |
| N  | 5.570286  | 0.000046 | 0.000000 |
| N  | 11.114025 | 4.823973 | 0.000000 |
| N  | 5.543753  | 4.823956 | 0.000000 |
| He | 0.000000  | 0.000000 | 0.000000 |

### ***Sample VASP input file***

*INCAR file for optimization:*

SYSTEM =C2N-h2D

Start parameter for this run

PREC = Accurate

ISTART = 0

ICHARG = 2

ENCUT = 520

Electronic relaxation

NELM = 80

NELMIN = 2

EDIFF = 1.E-08

LREAL = Auto

ALGO = Normal

GGA = PE

Ionic relaxation

EDIFFG = -0.001

NSW = 500

IBRION = 1

ISIF = 2

POTIM = 0.50

DOS related values

EMIN = -10

EMAX = 10  
NEDOS = 800  
ISMEAR = 0  
SIGMA = 0.05

Write flags

LWAVE = F  
LCHARG = F  
LORBIT = 12  
LVDW = T

*INCAR file for static energy calculation:*

SYSTEM =C2N-h2D

Start parameter for this run

PREC = Accurate  
ISTART = 0  
ICHARG = 2  
ENCUT = 520  
INIWAV = 1

Electronic relaxation

NELM = 80  
NELMIN = 2  
NELMDL = -5  
EDIFF = 1.E-08  
LREAL = Auto  
ALGO = Normal  
GGA = PE

Ionic relaxation

EDIFFG = -0.001  
NSW = 0  
IBRION = -1

ISIF = 2

POTIM = 0.50

DOS related values

EMIN = -10

EMAX = 10

NEDOS = 800

ISMear = -5

SIGMA = 0.05

Write flags

LWAVE = F

LCHARG = F

LORBIT = 12

LVDW = T
